# Supplementary material
Source: PubMed Central journal article supplement (PMC6575565)
Supplement: pnas.1821419116.sapp.pdf [file pnas.1821419116.sapp.pdf]

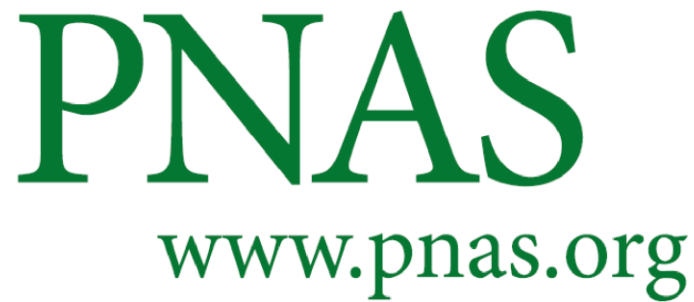

## Supplementary Information for

### **External Power Amplification Drives Prey Capture in a Spider Web**

S.I. Han<sup>1\*</sup>, H.C. Astley<sup>1</sup>, D.D. Maksuta<sup>1</sup>, T.A. Blackledge<sup>1</sup>

S.I.Han

Email: [Sih12@zips.uakron.edu](mailto:Sih12@zips.uakron.edu)

#### **This PDF file includes:**

Figure S1 and S2  
Table S1  
Captions for Movies S1 to S6  
References for SI reference citations

#### **Other supplementary materials for this manuscript include the following:**

Movies S1 to S6

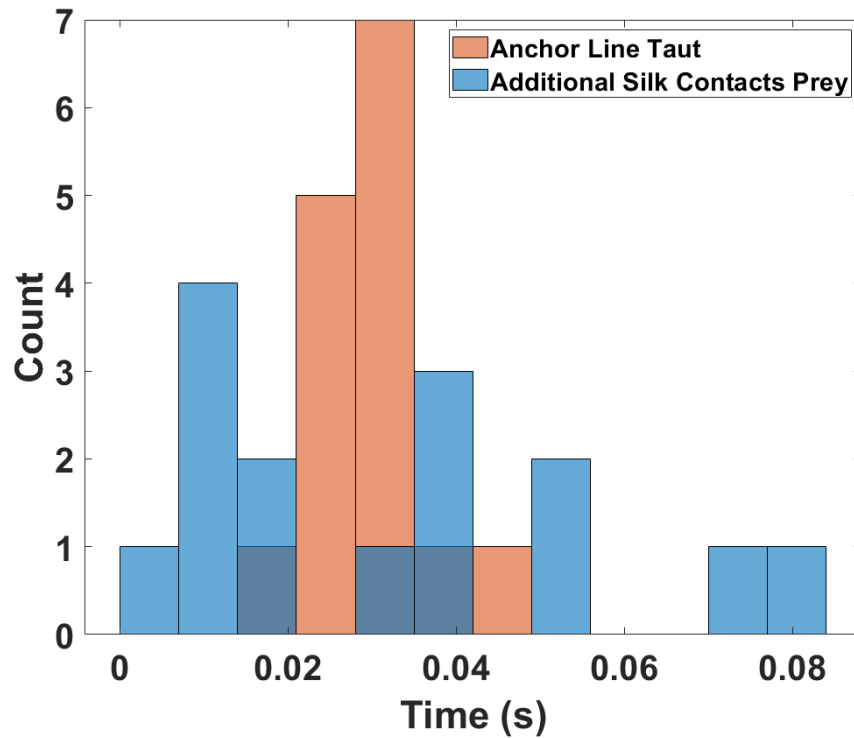

**Figure S1.** Histogram of time until the first extra strand of capture silk contacts the prey compared to the time for the anchor line to become taut at the end of the first forward cycle of the oscillation. In about half the encounters the initial forward motion of the web brought extra silk into contact with the prey within 10-20ms. In later time instances, extra strands of capture silk contacted the prey only as a result of oscillations due to web jerk.

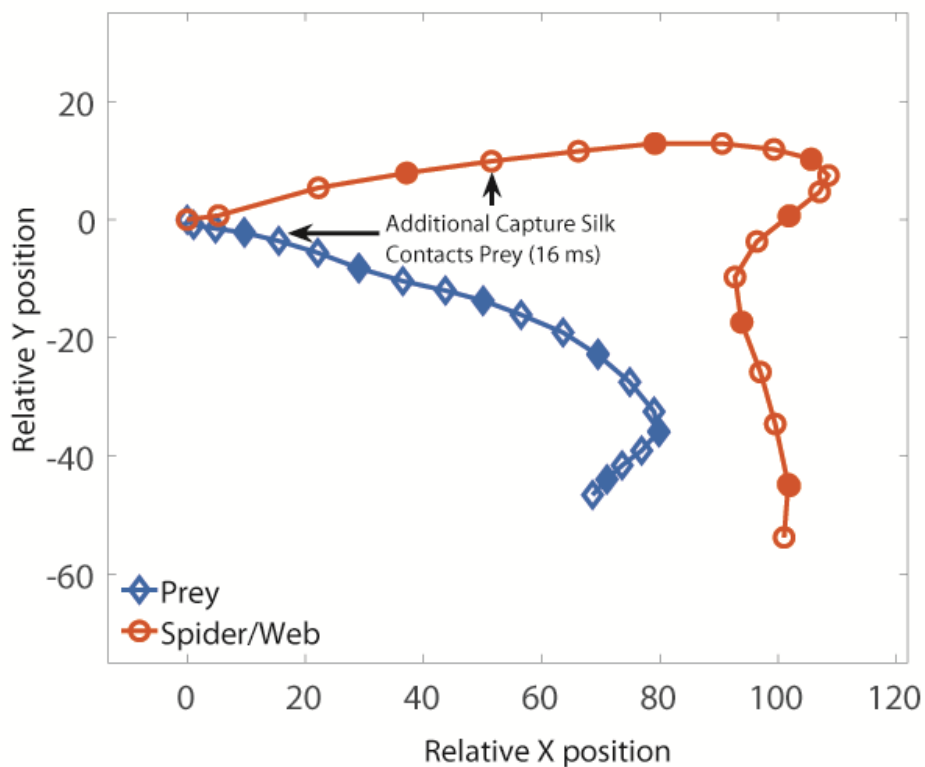

**Figure S2.** Relative position of prey and spider through time for a nearly horizontal web. Each mark indicates 4ms with filled marks at 12, 24, 32, 40, 48, 66, and 74 ms. 16 ms after release additional capture silk comes into contact with the prey. The spider and web initially move much further and faster in the X direction relative to the prey, due to their large inertial differences. The movement in the Y direction is mostly due to gravity, and occurs largely after the first forward cycle of the web.

**Table S1.** Comparison of power-amplified accelerations and velocities. *Hyptiotes* ranks midway in acceleration for whole body movements in arthropods.

| Event                    | Max Acceleration        | Max Speed             | Source                  |
|--------------------------|-------------------------|-----------------------|-------------------------|
| Mantis Shrimp Strike     | 104000m s <sup>-2</sup> | 23m s <sup>-1</sup>   | Patek et al. 2004       |
| Trap-Jaw Ant Jaws        | 12988 m s <sup>-2</sup> | 64.3m s <sup>-1</sup> | Patek et al. 2006       |
| Froghopper Jump          | 5400m s <sup>-2</sup>   | 4.7m s <sup>-1</sup>  | Burrows 2006            |
| Flea Jump                | 1600m s <sup>-2</sup>   | 1.9m s <sup>-1</sup>  | Sutton and Burrows 2011 |
| <i>Hyptiotes</i> Release | 771m s <sup>-2</sup>    | 2.15m s <sup>-1</sup> | Current paper           |
| Chameleon Tongue         | 486m s <sup>-2</sup>    | 5.41m s <sup>-1</sup> | Anderson 2016           |
| Grasshopper Jump         | 180m s <sup>-2</sup>    | 3.2m s <sup>-1</sup>  | Bennet-Clark 1975       |
| Bush Cricket Jump        | 114m s <sup>-2</sup>    | 2.1m s <sup>-1</sup>  | Burrows and Morris 2003 |

**Movie S1. Close-up of *Hyptiotes* release movement: abrupt braking (slowed 200x)**

*Hyptiotes* abruptly brakes at time ~4s without releasing any noticeable silk. Due to the center of mass of the *Hyptiotes* being out of line with the anchor and trap line the excess translational energy not stored in the anchor line elastically is converted to rotational energy. The rotation of the body causes the web to recoil out of phase with the translational motion.

**Movie S2. Whole web view of *Hyptiotes* prey capture (real time)**

After a fly impacts its web, *Hyptiotes* performs five extremely rapid sequential release events to capture its prey. The entire web is mostly collapsed by the fifth release. After the fifth release *Hyptiotes* further collapses the web by lengthening the anchor line without a release event.

**Movie S3. Whole web view of *Hyptiotes* prey capture (slowed 8.3x)**

One slowed-down release movement from Supplementary Video 2 as *Hyptiotes* catches and tangles a fly.

**Movie S4. Close-up of prey being flung into silk during release movement (slowed 25x)**

*Hyptiotes* (off-screen left) releases the anchor line, causing the web to spring forward. This causes capture threads to cross the fly's body, further adhering it as it is simultaneously flung into additional sections of the web.

**Movie S5. Close-up of *Hyptiotes* release movement: unspooling and braking (slowed 200x)**

Video demonstrating the unspooling behavior of *Hyptiotes*. Once the anchor line becomes taut (~3s), *Hyptiotes* releases more silk, allowing the spider to continue moving forward. The extent of unspooling can be inferred by comparing the location of the *Hyptiotes* at ~3s to the location at the end of the video (9s).

**Movie S6. Simulated release motion of a simplified *Hyptiotes* system using MATLAB**

Simulation is analyzed by tracking the position and rotation of the body and web. The shape and mass distribution and initial energy are the working variables of the simulation.

**References**

1. Patek SN, Korff WL, Caldwell RL (2004) Biomechanics: deadly strike mechanism of a mantis shrimp. *Nature* 428(6985):819–820.
2. Patek SN, Baio JE, Fisher BL, Suarez AV (2006) Multifunctionality and mechanical origins: ballistic jaw propulsion in trap-jaw ants. *Proc Natl Acad Sci U S A* 103(34):12787–12792.
3. Burrows M (2006) Jumping performance of froghopper insects. *J Exp Biol* 209(Pt 23):4607–4621.
4. Sutton GP, Burrows M (2011) Biomechanics of jumping in the flea. *J Exp Biol* 214(Pt 5):836–847.
5. Anderson CV (2016) Off like a shot: scaling of ballistic tongue projection reveals extremely high performance in small chameleons. *Sci Rep* 6:18625.
6. Bennet-Clark HC (1975) The energetics of the jump of the locust *Schistocerca gregaria*. *J Exp Biol* 63(1):53–83.
7. Burrows M, Morris O (2003) Jumping and kicking in bush crickets. *J Exp Biol* 206(Pt 6):1035–1049.
